# Supplementary material for: SoxE group transcription factor Sox8 promotes astrocytic differentiation of neural stem/precursor cells downstream of Nfia
Source: PubMed Central journal article supplement — Pharmacol Res Perspect. 2021 Oct 22;9(6):e00749. doi: 10.1002/prp2.749 (PMC8532136; doi:10.1002/prp2.749), 2021-10-22
Supplement: PRP2-9-e00749-s001.pdf [file PRP2-9-e00749-s001.pdf]

(A)

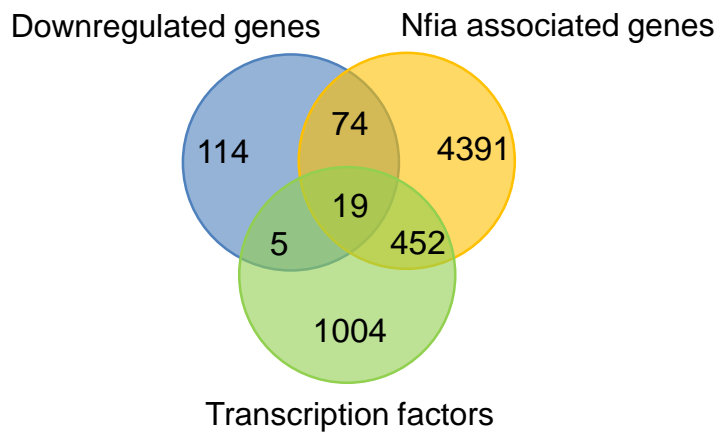

(B)

| Gene   | Fold change |
|--------|-------------|
| Id4    | 0.488       |
| Dlx6   | 0.490       |
| Dlx5   | 0.496       |
| Emx1   | 0.510       |
| Fezf2  | 0.512       |
| Dlx2   | 0.517       |
| Sp9    | 0.547       |
| Dlx1   | 0.557       |
| Scrt2  | 0.576       |
| Dmrta2 | 0.584       |
| Zic3   | 0.596       |
| Zic4   | 0.613       |
| Pax6   | 0.618       |
| Bcl11a | 0.631       |
| Arx    | 0.635       |
| Zic1   | 0.638       |
| Scrt1  | 0.642       |
| Zscan2 | 0.651       |
| Hes5   | 0.665       |

Figure S1

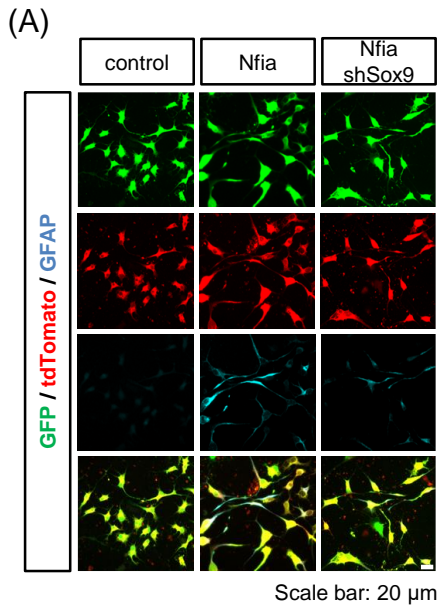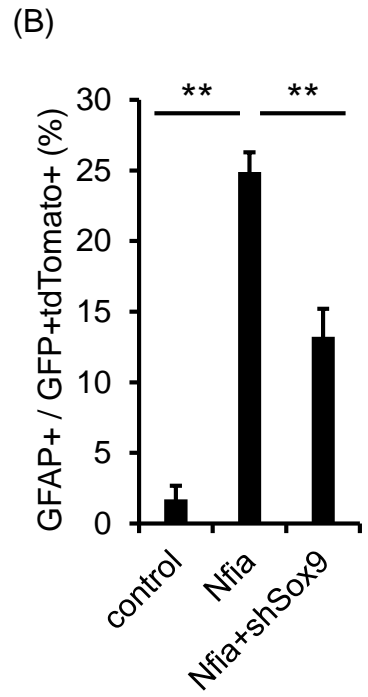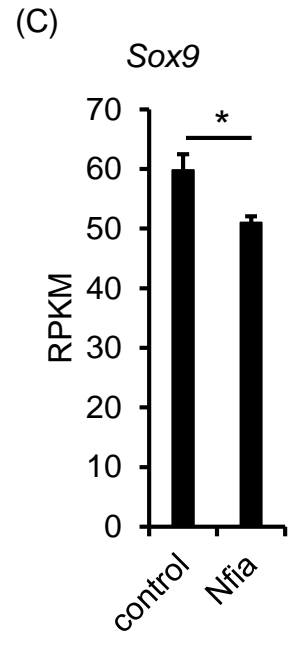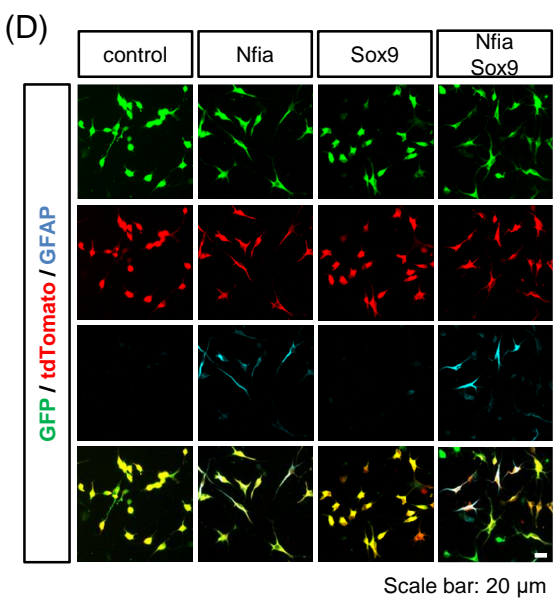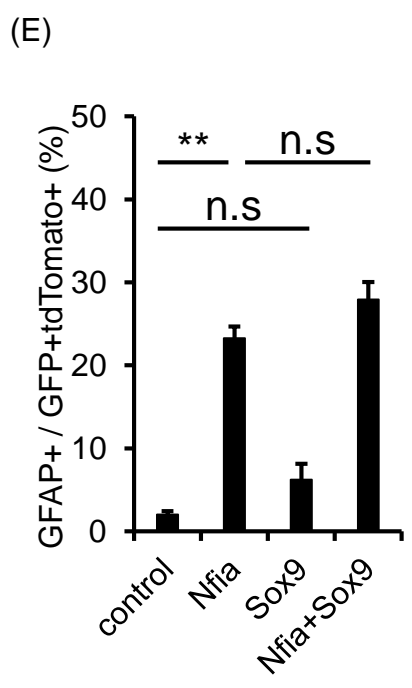

Figure S2

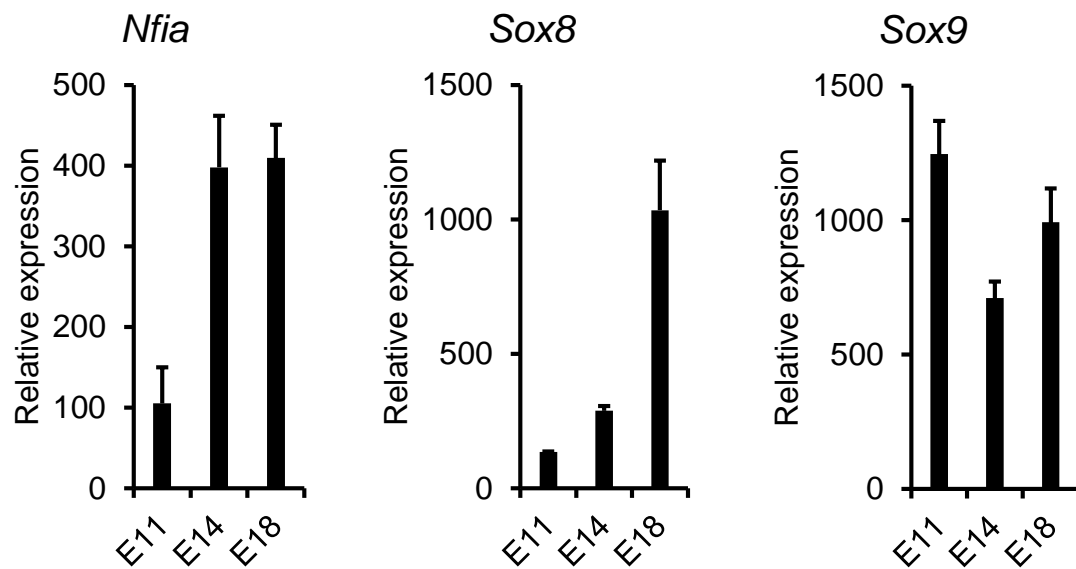

Figure S3
